# Supplementary material
Source: HighWire-hosted journal article supplement (https://learnmem.cshlp.org/content/suppl/2023/09/19/30.9.192)
Supplement: Supplementary_Material.docx [file Supplementary_Material.docx]

**Supplementary Information**

**for**

**Targeted memory reactivation during slow wave sleep vs. sleep stage N2: No significant differences in a vocabulary task**

Anna Wick1, Björn Rasch1 *

1. Department of Psychology, University of Fribourg, Fribourg, Switzerland

*Corresponding author:
Björn Rasch, Department of Psychology, University of Fribourg, Fribourg, Switzerland, Rue P.-A-de-Faucigny 2, CH-1700 Fribourg. Email: Bjoern.rasch@unifr.ch

Table S1

Phase 1: Passive Encoding

Date: N2N3

| 1 | hak.wav | Haken.wav |  | 61 | maaltijd.wav | Essen.wav |  |
| --- | --- | --- | --- | --- | --- | --- | --- |
| 2 | vaas.wav | Vase.wav |  | 62 | hoek.wav | Ecke.wav |  |
| 3 | tafel.wav | Tisch.wav |  | 63 | kermis.wav | Jahrmarkt.wav |  |
| 4 | hout.wav | Holz.wav |  | 64 | dorp.wav | Dorf.wav |  |
| 5 | ijzer.wav | Eisen.wav |  | 65 | trui.wav | Trikot.wav |  |
| 6 | penseel.wav | Pinsel.wav |  | 66 | munitie.wav | Munition.wav |  |
| 7 | draad.wav | Faden.wav |  | 67 | kerk.wav | Kirche.wav |  |
| 8 | burcht.wav | Burg.wav |  | 68 | berk.wav | Birke.wav |  |
| 9 | worst.wav | Wurst.wav |  | 69 | bloes.wav | Bluse.wav |  |
| 10 | sluis.wav | Schleuse.wav |  | 70 | zwaan.wav | Schwan.wav |  |
| 11 | bijl.wav | Axt.wav |  | 71 | graat.wav | Graete.wav |  |
| 12 | tegel.wav | Fliese.wav |  | 72 | beugel.wav | Buegel.wav |  |
| 13 | spijs.wav | Brei.wav |  | 73 | gist.wav | Hefe.wav |  |
| 14 | olijf.wav | Olive.wav |  | 74 | vijg.wav | Feige.wav |  |
| 15 | pols.wav | Puls.wav |  | 75 | dijk.wav | Teich.wav |  |
| 16 | moeras.wav | Sumpf.wav |  | 76 | deur.wav | Tuer.wav |  |
| 17 | twijg.wav | Zweig.wav |  | 77 | soep.wav | Suppe.wav |  |
| 18 | koor.wav | Chor.wav |  | 78 | fles.wav | Flasche.wav |  |
| 19 | vorst.wav | Frost.wav |  | 79 | grond.wav | Boden.wav |  |
| 20 | graf.wav | Grab.wav |  | 80 | ketting.wav | Kette.wav |  |
| 21 | veer.wav | Feder.wav |  | 81 | bagage.wav | Gepaeck.wav |  |
| 22 | werf.wav | Hof.wav |  | 82 | droom.wav | Traum.wav |  |
| 23 | slot.wav | Schloss.wav |  | 83 | hei.wav | Heide.wav |  |
| 24 | goud.wav | Gold.wav |  | 84 | rasp.wav | Reibe.wav |  |
| 25 | boon.wav | Bohne.wav |  | 85 | molen.wav | Muehle.wav |  |
| 26 | servet.wav | Serviette.wav |  | 86 | strook.wav | Streifen.wav |  |
| 27 | vuur.wav | Feuer.wav |  | 87 | walm.wav | Qualm.wav |  |
| 28 | schrift.wav | Heft.wav |  | 88 | kogel.wav | Kugel.wav |  |
| 29 | borst.wav | Brust.wav |  | 89 | steiger.wav | Steg.wav |  |
| 30 | duim.wav | Daumen.wav |  | 90 | stof.wav | Staub.wav |  |
| 31 | griep.wav | Grippe.wav |  | 91 | steen.wav | Stein.wav |  |
| 32 | woordenboek.wav | Woerterbuch.wav |  | 92 | boord.wav | Ufer.wav |  |
| 33 | huis.wav | Haus.wav |  | 93 | kus.wav | Kuss.wav |  |
| 34 | draak.wav | Drache.wav |  | 94 | zoogdier.wav | Saeugetier.wav |  |
| 35 | folder.wav | Prospekt.wav |  | 95 | zak.wav | Tasche.wav |  |
| 36 | landschap.wav | Landschaft.wav |  | 96 | zitkamer.wav | Wohnzimmer.wav |  |
| 37 | rits.wav | Reihe.wav |  | 97 | bezem.wav | Besen.wav |  |
| 38 | munt.wav | Muenze.wav |  | 98 | werktuig.wav | Werkzeug.wav |  |
| 39 | mees.wav | Meise.wav |  | 99 | straat.wav | Strasse.wav |  |
| 40 | onderdak.wav | Unterkunft.wav |  | 100 | eiwit.wav | Eiweiss.wav |  |
| 41 | vakantie.wav | Ferien.wav |  | 101 | paart.wav | Pferd.wav |  |
| 42 | schouder.wav | Schulter.wav |  | 102 | lepel.wav | Loeffel.wav |  |
| 43 | navel.wav | Nabel.wav |  | 103 | inkt.wav | Tinte.wav |  |
| 44 | dak.wav | Dach.wav |  | 104 | aarde.wav | Erde.wav |  |
| 45 | luis.wav | Laus.wav |  | 105 | naam.wav | Name.wav |  |
| 46 | zeep.wav | Seife.wav |  | 106 | rubber.wav | Gummi.wav |  |
| 47 | gijzelaar.wav | Geisel.wav |  | 107 | amandel.wav | Mandel.wav |  |
| 48 | wol.wav | Wolle.wav |  | 108 | wil.wav | Rad.wav |  |
| 49 | dal.wav | Tief.wav |  | 109 | kuit.wav | Laich.wav |  |
| 50 | snuit.wav | Schnauze.wav |  | 110 | ijskast.wav | Kuehlschrank.wav |  |
| 51 | lever.wav | Leber.wav |  | 111 | gat.wav | Loch.wav |  |
| 52 | baars.wav | Barsch.wav |  | 112 | kraal.wav | Koralle.wav |  |
| 53 | kraag.wav | Kragen.wav |  | 113 | heuvel.wav | Huegel.wav |  |
| 54 | speeksel.wav | Speichel.wav |  | 114 | melk.wav | Milch.wav |  |
| 55 | doek.wav | Tuch.wav |  | 115 | lat.wav | Latte.wav |  |
| 56 | peer.wav | Birne.wav |  | 116 | boter.wav | Butter.wav |  |
| 57 | maag.wav | Magen.wav |  | 117 | been.wav | Knochen.wav |  |
| 58 | krijt.wav | Kreide.wav |  | 118 | schuur.wav | Schuppen.wav |  |
| 59 | meeuw.wav | Moewe.wav |  | 119 | stoom.wav | Dampf.wav |  |
| 60 | aroma.wav | Geruch.wav |  | 120 | snavel.wav | Schnabel.wav |  |

Table S2

Phase 2: Immediate Retrieval with Feedback

Date: N2N3

| 1 | Tuch.wav | doek.wav |  | 61 | Erde.wav | aarde.wav |  |
| --- | --- | --- | --- | --- | --- | --- | --- |
| 2 | Dampf.wav | stoom.wav |  | 62 | Feder.wav | veer.wav |  |
| 3 | Kirche.wav | kerk.wav |  | 63 | Brust.wav | borst.wav |  |
| 4 | Essen.wav | maaltijd.wav |  | 64 | Tuer.wav | deur.wav |  |
| 5 | Stein.wav | steen.wav |  | 65 | Hof.wav | werf.wav |  |
| 6 | Schleuse.wav | sluis.wav |  | 66 | Tasche.wav | zak.wav |  |
| 7 | Rad.wav | wil.wav |  | 67 | Speichel.wav | speeksel.wav |  |
| 8 | Knochen.wav | been.wav |  | 68 | Schwan.wav | zwaan.wav |  |
| 9 | Latte.wav | lat.wav |  | 69 | Haken.wav | hak.wav |  |
| 10 | Muehle.wav | molen.wav |  | 70 | Leber.wav | lever.wav |  |
| 11 | Hefe.wav | gist.wav |  | 71 | Axt.wav | bijl.wav |  |
| 12 | Feuer.wav | vuur.wav |  | 72 | Name.wav | naam.wav |  |
| 13 | Woerterbuch.wav | woordenboek.wav |  | 73 | Jahrmarkt.wav | kermis.wav |  |
| 14 | Landschaft.wav | landschap.wav |  | 74 | Sumpf.wav | moeras.wav |  |
| 15 | Dorf.wav | dorp.wav |  | 75 | Wurst.wav | worst.wav |  |
| 16 | Eiweiss.wav | eiwit.wav |  | 76 | Laich.wav | kuit.wav |  |
| 17 | Daumen.wav | duim.wav |  | 77 | Faden.wav | draad.wav |  |
| 18 | Seife.wav | zeep.wav |  | 78 | Grab.wav | graf.wav |  |
| 19 | Chor.wav | koor.wav |  | 79 | Trikot.wav | trui.wav |  |
| 20 | Wolle.wav | wol.wav |  | 80 | Puls.wav | pols.wav |  |
| 21 | Qualm.wav | walm.wav |  | 81 | Birne.wav | peer.wav |  |
| 22 | Schnabel.wav | snavel.wav |  | 82 | Kreide.wav | krijt.wav |  |
| 23 | Ecke.wav | hoek.wav |  | 83 | Geruch.wav | aroma.wav |  |
| 24 | Dach.wav | dak.wav |  | 84 | Heide.wav | hei.wav |  |
| 25 | Ufer.wav | boord.wav |  | 85 | Loeffel.wav | lepel.wav |  |
| 26 | Graete.wav | graat.wav |  | 86 | Kugel.wav | kogel.wav |  |
| 27 | Schuppen.wav | schuur.wav |  | 87 | Magen.wav | maag.wav |  |
| 28 | Frost.wav | vorst.wav |  | 88 | Drache.wav | draak.wav |  |
| 29 | Saeugetier.wav | zoogdier.wav |  | 89 | Haus.wav | huis.wav |  |
| 30 | Ferien.wav | vakantie.wav |  | 90 | Grippe.wav | griep.wav |  |
| 31 | Kuss.wav | kus.wav |  | 91 | Loch.wav | gat.wav |  |
| 32 | Gold.wav | goud.wav |  | 92 | Burg.wav | burcht.wav |  |
| 33 | Butter.wav | boter.wav |  | 93 | Wohnzimmer.wav | zitkamer.wav |  |
| 34 | Tief.wav | dal.wav |  | 94 | Buegel.wav | beugel.wav |  |
| 35 | Muenze.wav | munt.wav |  | 95 | Olive.wav | olijf.wav |  |
| 36 | Heft.wav | schrift.wav |  | 96 | Laus.wav | luis.wav |  |
| 37 | Vase.wav | vaas.wav |  | 97 | Staub.wav | stof.wav |  |
| 38 | Feige.wav | vijg.wav |  | 98 | Holz.wav | hout.wav |  |
| 39 | Werkzeug.wav | werktuig.wav |  | 99 | Reibe.wav | rasp.wav |  |
| 40 | Kette.wav | ketting.wav |  | 100 | Traum.wav | droom.wav |  |
| 41 | Schloss.wav | slot.wav |  | 101 | Milch.wav | melk.wav |  |
| 42 | Pferd.wav | paart.wav |  | 102 | Bohne.wav | boon.wav |  |
| 43 | Zweig.wav | twijg.wav |  | 103 | Barsch.wav | baars.wav |  |
| 44 | Mandel.wav | amandel.wav |  | 104 | Koralle.wav | kraal.wav |  |
| 45 | Tinte.wav | inkt.wav |  | 105 | Kuehlschrank.wav | ijskast.wav |  |
| 46 | Reihe.wav | rits.wav |  | 106 | Schnauze.wav | snuit.wav |  |
| 47 | Gepaeck.wav | bagage.wav |  | 107 | Teich.wav | dijk.wav |  |
| 48 | Kragen.wav | kraag.wav |  | 108 | Steg.wav | steiger.wav |  |
| 49 | Moewe.wav | meeuw.wav |  | 109 | Serviette.wav | servet.wav |  |
| 50 | Streifen.wav | strook.wav |  | 110 | Unterkunft.wav | onderdak.wav |  |
| 51 | Bluse.wav | bloes.wav |  | 111 | Brei.wav | spijs.wav |  |
| 52 | Fliese.wav | tegel.wav |  | 112 | Tisch.wav | tafel.wav |  |
| 53 | Huegel.wav | heuvel.wav |  | 113 | Eisen.wav | ijzer.wav |  |
| 54 | Meise.wav | mees.wav |  | 114 | Geisel.wav | gijzelaar.wav |  |
| 55 | Birke.wav | berk.wav |  | 115 | Suppe.wav | soep.wav |  |
| 56 | Besen.wav | bezem.wav |  | 116 | Flasche.wav | fles.wav |  |
| 57 | Gummi.wav | rubber.wav |  | 117 | Strasse.wav | straat.wav |  |
| 58 | Nabel.wav | navel.wav |  | 118 | Pinsel.wav | penseel.wav |  |
| 59 | Schulter.wav | schouder.wav |  | 119 | Munition.wav | munitie.wav |  |
| 60 | Prospekt.wav | folder.wav |  | 120 | Boden.wav | grond.wav |  |

Table S3

Phase 2: Immediate Retrieval without Feedback

Date: N2N3

| 1 | werf.wav | Hof.wav |  | 61 | onderdak.wav | Unterkunft.wav | |
| --- | --- | --- | --- | --- | --- | --- | --- |
| 2 | heuvel.wav | Huegel.wav |  | 62 | maaltijd.wav | Essen.wav |  |
| 3 | aroma.wav | Geruch.wav |  | 63 | twijg.wav | Zweig.wav |  |
| 4 | huis.wav | Haus.wav |  | 64 | wil.wav | Rad.wav |  |
| 5 | dak.wav | Dach.wav |  | 65 | steiger.wav | Steg.wav |  |
| 6 | beugel.wav | Buegel.wav |  | 66 | draad.wav | Faden.wav |  |
| 7 | droom.wav | Traum.wav |  | 67 | lat.wav | Latte.wav |  |
| 8 | munitie.wav | Munition.wav |  | 68 | kuit.wav | Laich.wav |  |
| 9 | vijg.wav | Feige.wav |  | 69 | dal.wav | Tief.wav |  |
| 10 | zwaan.wav | Schwan.wav |  | 70 | kermis.wav | Jahrmarkt.wav |  |
| 11 | dijk.wav | Teich.wav |  | 71 | sluis.wav | Schleuse.wav |  |
| 12 | bijl.wav | Axt.wav |  | 72 | been.wav | Knochen.wav |  |
| 13 | peer.wav | Birne.wav |  | 73 | duim.wav | Daumen.wav |  |
| 14 | stof.wav | Staub.wav |  | 74 | ketting.wav | Kette.wav |  |
| 15 | worst.wav | Wurst.wav |  | 75 | meeuw.wav | Moewe.wav |  |
| 16 | werktuig.wav | Werkzeug.wav |  | 76 | boter.wav | Butter.wav |  |
| 17 | krijt.wav | Kreide.wav |  | 77 | snavel.wav | Schnabel.wav |  |
| 18 | kogel.wav | Kugel.wav |  | 78 | moeras.wav | Sumpf.wav |  |
| 19 | draak.wav | Drache.wav |  | 79 | eiwit.wav | Eiweiss.wav |  |
| 20 | hei.wav | Heide.wav |  | 80 | servet.wav | Serviette.wav |  |
| 21 | vuur.wav | Feuer.wav |  | 81 | lepel.wav | Loeffel.wav |  |
| 22 | griep.wav | Grippe.wav |  | 82 | grond.wav | Boden.wav |  |
| 23 | munt.wav | Muenze.wav |  | 83 | zak.wav | Tasche.wav |  |
| 24 | kerk.wav | Kirche.wav |  | 84 | soep.wav | Suppe.wav |  |
| 25 | stoom.wav | Dampf.wav |  | 85 | steen.wav | Stein.wav |  |
| 26 | gijzelaar.wav | Geisel.wav |  | 86 | kraal.wav | Koralle.wav |  |
| 27 | vaas.wav | Vase.wav |  | 87 | naam.wav | Name.wav |  |
| 28 | pols.wav | Puls.wav |  | 88 | maag.wav | Magen.wav |  |
| 29 | tegel.wav | Fliese.wav |  | 89 | navel.wav | Nabel.wav |  |
| 30 | zoogdier.wav | Saeugetier.wav |  | 90 | doek.wav | Tuch.wav |  |
| 31 | hoek.wav | Huegel.wav |  | 91 | bezem.wav | Besen.wav |  |
| 32 | mees.wav | Meise.wav |  | 92 | rubber.wav | Gummi.wav |  |
| 33 | ijzer.wav | Eisen.wav |  | 93 | straat.wav | Strasse.wav |  |
| 34 | ijskast.wav | Kuehlschrank.wav |  | 94 | olijf.wav | Olive.wav |  |
| 35 | strook.wav | Streifen.wav |  | 95 | walm.wav | Qualm.wav |  |
| 36 | graf.wav | Grab.wav |  | 96 | kus.wav | Kuss.wav |  |
| 37 | aarde.wav | Erde.wav |  | 97 | rits.wav | Reihe.wav |  |
| 38 | paart.wav | Pferd.wav |  | 98 | lever.wav | Leber.wav |  |
| 39 | dorp.wav | Dorf.wav |  | 99 | rasp.wav | Reibe.wav |  |
| 40 | goud.wav | Gold.wav |  | 100 | folder.wav | Prospekt.wav |  |
| 41 | veer.wav | Feder.wav |  | 101 | gat.wav | Loch.wav |  |
| 42 | fles.wav | Flasche.wav |  | 102 | inkt.wav | Tinte.wav |  |
| 43 | penseel.wav | Pinsel.wav |  | 103 | zitkamer.wav | Wohnzimmer.wav | |
| 44 | melk.wav | Milch.wav |  | 104 | bagage.wav | Gepaeck.wav |  |
| 45 | gist.wav | Hefe.wav |  | 105 | slot.wav | Schloss.wav |  |
| 46 | boon.wav | Bohne.wav |  | 106 | baars.wav | Barsch.wav |  |
| 47 | luis.wav | Laus.wav |  | 107 | deur.wav | Tuer.wav |  |
| 48 | hout.wav | Holz.wav |  | 108 | vorst.wav | Frost.wav |  |
| 49 | spijs.wav | Brei.wav |  | 109 | landschap.wav | Landschaft.wav | |
| 50 | speeksel.wav | Speichel.wav |  | 110 | borst.wav | Brust.wav |  |
| 51 | koor.wav | Chor.wav |  | 111 | wol.wav | Wolle.wav |  |
| 52 | schuur.wav | Schuppen.wav |  | 112 | kraag.wav | Kragen.wav |  |
| 53 | woordenboek.wav | Woerterbuch.wav |  | 113 | graat.wav | Graete.wav |  |
| 54 | trui.wav | Trikot.wav |  | 114 | amandel.wav | Mandel.wav |  |
| 55 | hak.wav | Haken.wav |  | 115 | boord.wav | Ufer.wav |  |
| 56 | vakantie.wav | Ferien.wav |  | 116 | bloes.wav | Bluse.wav |  |
| 57 | tafel.wav | Tisch.wav |  | 117 | berk.wav | Birke.wav |  |
| 58 | burcht.wav | Burg.wav |  | 118 | schrift.wav | Heft.wav |  |
| 59 | zeep.wav | Seife.wav |  | 119 | snuit.wav | Schnauze.wav |  |
| 60 | molen.wav | Muehle.wav |  | 120 | schouder.wav | Schulter.wav |  |
